# Supplementary material for: Molecular Identification of Dendrobium Species (Orchidaceae) Based on the DNA Barcode ITS2 Region and Its Application for Phylogenetic Study
Source: PubMed Central journal article supplement (PMC4613292; doi:10.3390/ijms160921975), 2015-09-11
Supplement: ijms-16-21975-s001.pdf [file ijms-16-21975-s001.pdf]

## Supplementary Information

**Table S1.** Accession numbers of the ITS2 sequences of 64 *Dendrobium* species, four *Pholidota* species, and four *Bulbophyllum* species from GenBank.

| No. | Sections          | Species                                               | Number of Samples | Genebank Accession Numbers                                                                                                                                                                             |
|-----|-------------------|-------------------------------------------------------|-------------------|--------------------------------------------------------------------------------------------------------------------------------------------------------------------------------------------------------|
| 1   | <i>Dendrobium</i> | <i>D. hancockii</i> Rolfe                             | 10                | AB593575, HM590377, HQ114259, FJ384726, AF362038, DQ058787, AF362025, JN388591, FJ384725, EU003120                                                                                                     |
| 2   | <i>Dendrobium</i> | <i>D. lohohense</i><br>T. Tang et F. T. Wang          | 3                 | AF314135, AF363024, JN388574                                                                                                                                                                           |
| 3   | <i>Dendrobium</i> | <i>D. harveyanum</i> Rchb. f.                         | 4                 | HQ114226, AB593576, EU477506, JN388594                                                                                                                                                                 |
| 4   | <i>Dendrobium</i> | <i>D. nobile</i> Lindl.                               | 13                | HQ114219, HQ114217, HQ114218, EF618732, AF362046, AF362028, AF362045, AF362039, AF362037, FJ378649, FJ384727, FJ384728, FJ530948                                                                       |
| 5   | <i>Dendrobium</i> | <i>D. chrysanthum</i> Lindl.                          | 18                | HM054593, HM590376, HM054592, JF713091, HM054597, HM054599, HM054598, HQ114238, AF355572, AF362047, JN388584, JF713093, JF713092, FJ384738, EU003119, HM054594, JF713090, AF314126                     |
| 6   | <i>Dendrobium</i> | <i>D. wardianum</i> Warner                            | 5                 | HQ114232, HQ114231, AF420245, JN388600, DQ058789                                                                                                                                                       |
| 7   | <i>Dendrobium</i> | <i>D. guangxiense</i> S. J. Cheng et C. Z. Tang       | 1                 | GU339108                                                                                                                                                                                               |
| 8   | <i>Dendrobium</i> | <i>D. aphyllum</i> (Roxb.)<br>C. E. Fischer           | 20                | HM054560, HM054558, HM054556, HM054554, HM054552, HM054550, HM054561, HM054559, HM054557, HM054553, HM054551, HM054549, JN388571, HQ114247, HQ114248, AB593539, HM590384, FJ428219, EU840691, AF355573 |
| 9   | <i>Dendrobium</i> | <i>D. flexicaule</i> Z. H. Tsi, S. C. Sun et L. C. Xu | 2                 | AF355570, FJ384743                                                                                                                                                                                     |
| 10  | <i>Dendrobium</i> | <i>D. gibsonii</i> Lindl.                             | 1                 | GU339105                                                                                                                                                                                               |
| 11  | <i>Dendrobium</i> | <i>D. henryi</i> Schltr.                              | 1                 | EF629323                                                                                                                                                                                               |
| 12  | <i>Dendrobium</i> | <i>D. capillipes</i> Rchb. f.                         | 3                 | HQ114224, JN388582, AF362035                                                                                                                                                                           |
| 13  | <i>Dendrobium</i> | <i>D. heterocarpum</i> Lindl.                         | 6                 | JF713106, JF713105, HM054667, JN388592, JN388593, GU339101                                                                                                                                             |
| 14  | <i>Dendrobium</i> | <i>D. linawianum</i> Rchb. f.                         | 6                 | HM590371, AB593599, AF521613, EU003117, EU003115, JN388573                                                                                                                                             |
| 15  | <i>Dendrobium</i> | <i>D. lituiflorum</i> Lindl.                          | 2                 | AB593602, AF355571                                                                                                                                                                                     |
| 16  | <i>Dendrobium</i> | <i>D. fimbriatum</i> Hook                             | 8                 | EU003116, AF314130, HM054635, HM054632, HM054636, HM054633, HM054637, HM590392                                                                                                                         |
| 17  | <i>Dendrobium</i> | <i>D. parishii</i> Rchb. f.                           | 5                 | HM590378, AB593630, HM054735, HM054736, EU121417                                                                                                                                                       |
| 18  | <i>Dendrobium</i> | <i>D. primulinum</i> Lindl.                           | 16                | HM054756, HM054754, HM054752, HM054750, HM054748, HM054757, HM054755, HM054753, HM054751, HM054749, HM054747, JN388598, JN388597, HQ114242, AB593641, AF362913                                         |

Table S1. Cont.

| No. | Sections           | Species                                   | Number of Samples | Genebank Accession Numbers                                                                                                                                                                                                                                    |
|-----|--------------------|-------------------------------------------|-------------------|---------------------------------------------------------------------------------------------------------------------------------------------------------------------------------------------------------------------------------------------------------------|
| 19  | <i>Dendrobium</i>  | <i>D. gratiosissimum</i> Rchb. f.         | 4                 | JN388590, FJ384737, DQ058790, AF311780                                                                                                                                                                                                                        |
| 20  | <i>Dendrobium</i>  | <i>D. moschatum</i><br>(Buch. –Ham.) Sw.  | 11                | HM054716, HM054714, HM054712, HM054710,<br>HM054715, HM054711, HM054709, EF629326,<br>AY485695, AY239983, AF314137                                                                                                                                            |
| 21  | <i>Dendrobium</i>  | <i>D. findleyanum</i><br>Par. Et Rchb. f. | 4                 | JN388589, HQ114257, AF362031, EU477504                                                                                                                                                                                                                        |
| 22  | <i>Dendrobium</i>  | <i>D. falconeri</i> Hook.                 | 3                 | JF713102, HQ114239, FJ384734                                                                                                                                                                                                                                  |
| 23  | <i>Dendrobium</i>  | <i>D. devonianum</i> Paxt.                | 7                 | JF713100, JF713098, JF713099, HQ114244,<br>EU477502, FJ384735, AF311779                                                                                                                                                                                       |
| 24  | <i>Dendrobium</i>  | <i>D. dixanthum</i> Rchb. f.              | 2                 | GU339103, DQ058788                                                                                                                                                                                                                                            |
| 25  | <i>Dendrobium</i>  | <i>D. pendulum</i> Roxb.                  | 5                 | HQ114234, DQ058791, EU477508,<br>AF362912, GU339115                                                                                                                                                                                                           |
| 26  | <i>Dendrobium</i>  | <i>D. aurantiacum</i> Rchb. f.            | 2                 | AF362044, AF362042,                                                                                                                                                                                                                                           |
| 27  | <i>Dendrobium</i>  | <i>D. moniliforme</i> (L.) Sw.            | 4                 | HQ114246, GU339111, EU003114, AF314136                                                                                                                                                                                                                        |
| 28  | <i>Dendrobium</i>  | <i>D. officinale</i><br>Kimura et Migo    | 18                | HQ114245, GU339109, EU592018, FJ384723,<br>FJ384724, FJ588873, FJ588871, FJ530946,<br>FJ530944, EF221849, FJ588872, FJ530947,<br>FJ530945, EF221854, EF221850, EF221848,<br>AF311776, AF314139                                                                |
| 29  | <i>Dendrobium</i>  | <i>D. crepidatum</i><br>Lindl. ex Paxt.   | 24                | HM054624, HM054620, HM054618, HM054614,<br>HM054612, HM054610, HM054608, HM054606,<br>HM054604, HM054623, HM054621, HM054619,<br>HM054617, HM054613, HM054611, HM054609,<br>HM054607, HM054605, HM054603, JN388586,<br>HQ114240, AY842035, AF314128, AF355574 |
| 30  | <i>Dendrobium</i>  | <i>D. loddigesii</i> Rolfe                | 9                 | JN388569, HQ114220, AB593604,<br>EU592016, HM590374, AY485703,<br>EU121418, AF314134, AF311778                                                                                                                                                                |
| 31  | <i>Dendrobium</i>  | <i>D. tosaense</i> Makino                 | 3                 | EU003113, HM590367, AF521617                                                                                                                                                                                                                                  |
| 32  | <i>Dendrobium</i>  | <i>D. crystallinum</i> Tchb. F.           | 3                 | HQ114243, KF143447, GU339116                                                                                                                                                                                                                                  |
| 33  | <i>Dendrobium</i>  | <i>D. denneanum</i> Kerr.                 | 9                 | FJ384731, AF362043, FJ384732,<br>FJ530949, FJ38473, EU840702,<br>AF362040, JN388572, FJ384729                                                                                                                                                                 |
| 34  | <i>Grastidium</i>  | <i>D. somai</i> Hayata                    | 3                 | HM590380, EU840692, AF521616                                                                                                                                                                                                                                  |
| 35  | <i>Grastidium</i>  | <i>D. salaccense</i> (Bl.) Lindl.         | 2                 | HQ114260, JN388577                                                                                                                                                                                                                                            |
| 36  | <i>Grastidium</i>  | <i>D. furcatopedicellatum</i><br>Hayata   | 1                 | AF521611                                                                                                                                                                                                                                                      |
| 37  | <i>Grastidium</i>  | <i>D. leptocladum</i> Hayata              | 3                 | HM590373, AF521612, EU840697                                                                                                                                                                                                                                  |
| 38  | <i>Chrysotoxae</i> | <i>D. lindleyi</i> Stendel                | 4                 | JN388568, GU339114, DQ058784, AF314133                                                                                                                                                                                                                        |
| 39  | <i>Chrysotoxae</i> | <i>D. jenkinsii</i> Lindl.                | 8                 | JF713108, HM054670, JF713109, HM054671,<br>JN388595, HQ114251, DQ058785, AF314132                                                                                                                                                                             |
| 40  | <i>Chrysotoxae</i> | <i>D. sulcatum</i> Lindl.                 | 1                 | EU477510                                                                                                                                                                                                                                                      |

Table S1. Cont.

| No. | Sections               | Species                                           | Number of Samples | Genebank Accession Numbers                                                                         |
|-----|------------------------|---------------------------------------------------|-------------------|----------------------------------------------------------------------------------------------------|
| 41  | <i>Chrysotoxae</i>     | <i>D. chrysotoxum</i> Lindl.                      | 10                | HQ114221, HQ114223, AF314127, HM590383, HQ114222, AF362023, FJ384736, HM054601, EU477501, JN388585 |
| 42  | <i>Chrysotoxae</i>     | <i>D. densiflorum</i> Lindl.                      | 3                 | HM054626, JF713097, AF314129                                                                       |
| 43  | <i>Chrysotoxae</i>     | <i>D. thyrsiflorum</i> Rchb. f.                   | 6                 | AY240001, HM054760, HQ114227, FJ384733, AF362032, HM054758                                         |
| 44  | <i>Distichophyllum</i> | <i>D. ellipsophyllum</i><br>T. Tang et F. T. Wang | 2                 | AF362033, AY239965                                                                                 |
| 45  | <i>Breviflores</i>     | <i>D. aduncum</i> Lindl.                          | 4                 | AF314125, GU339110, JN388580, JF713083                                                             |
| 46  | <i>Breviflores</i>     | <i>D. hercoglossum</i> Rchb. f.                   | 3                 | AB593580, AF314131, JN388576                                                                       |
| 47  | <i>Stuposa</i>         | <i>D. stuposum</i> Lindl.                         | 3                 | JN388599, HQ114237, GU339104                                                                       |
| 48  | <i>Pedilonum</i>       | <i>D. goldschmidtianum</i>                        | 2                 | AY239970, EU840695                                                                                 |
| 49  | <i>Pedilonum</i>       | <i>D. chameleon</i> Ames                          | 1                 | AF521607                                                                                           |
| 50  | <i>Formosae</i>        | <i>D. bellatulum</i> Rolfe                        | 1                 | EU592015                                                                                           |
| 51  | <i>Formosae</i>        | <i>D. trigonopus</i> Rchb. f.                     | 1                 | HQ114228                                                                                           |
| 52  | <i>Formosae</i>        | <i>D. sinense</i><br>T. Tang et F. T. Wang        | 1                 | JN388578                                                                                           |
| 53  | <i>Formosae</i>        | <i>D. longicornu</i> Lindl.                       | 2                 | GU339112, DQ058796                                                                                 |
| 54  | <i>Formosae</i>        | <i>D. infundibulum</i> Lindl.                     | 2                 | HM054669, HM054668                                                                                 |
| 55  | <i>Formosae</i>        | <i>D. cariniferum</i> Rchb. f.                    | 1                 | AF362027                                                                                           |
| 56  | <i>Formosae</i>        | <i>D. williamsonii</i><br>Day et Rchb. f.         | 3                 | HQ114225, AF314140, AF362030                                                                       |
| 57  | <i>Formosae</i>        | <i>D. christyanum</i> Rchb. F.                    | 2                 | GU339106, EF629325                                                                                 |
| 58  | <i>Stachyobium</i>     | <i>D. strongylanthum</i> Rchb. f.                 | 3                 | DQ058797, GU339107, FJ384739                                                                       |
| 59  | <i>Stachyobium</i>     | <i>D. monticola</i> P. F.<br>Hunt et Summerh.     | 2                 | DQ058798, DQ058799                                                                                 |
| 60  | <i>Stachyobium</i>     | <i>D. minutiflorum</i> S. C.<br>Chen et Z. H. Tsi | 1                 | DQ058800                                                                                           |
| 61  | <i>Crumenata</i>       | <i>D. crumenatum</i> Sw.                          | 8                 | HM590370, HM054625, JN388587, AF521608, JF713096, JF713095, AY239963, EU840700                     |
| 62  | <i>Crumenata</i>       | <i>D. equitans</i> Kraenzl.                       | 3                 | HM590388, EU840701, AF521609                                                                       |
| 63  | <i>Aporum</i>          | <i>D. terminale</i> Par. et Rchb. f.              | 1                 | DQ058801                                                                                           |
| 64  | <i>Strongyle</i>       | <i>D. parciflorum</i> Rolfe                       | 2                 | HQ114252, JN388575                                                                                 |
| 65  | Outgroup               | <i>P. chinensis</i> Lindl.                        | 1                 | EU592035                                                                                           |
| 66  | Outgroup               | <i>P. cantonensis</i> Rolfe                       | 1                 | AF314141                                                                                           |
| 67  | Outgroup               | <i>P. imbricata</i> Hook                          | 1                 | AF302737                                                                                           |
| 68  | Outgroup               | <i>P. carnea</i> Lindl.                           | 1                 | AF302738                                                                                           |
| 69  | Outgroup               | <i>B. orientale</i> Seidenf.                      | 1                 | JN619416                                                                                           |
| 70  | Outgroup               | <i>B. inconspicuum</i> Maxim                      | 1                 | AB786895                                                                                           |
| 71  | Outgroup               | <i>B. kwangtungense</i> Schltr.                   | 1                 | JN619414                                                                                           |
| 72  | Outgroup               | <i>B. omerandrum</i> Hayata                       | 1                 | JN619419                                                                                           |

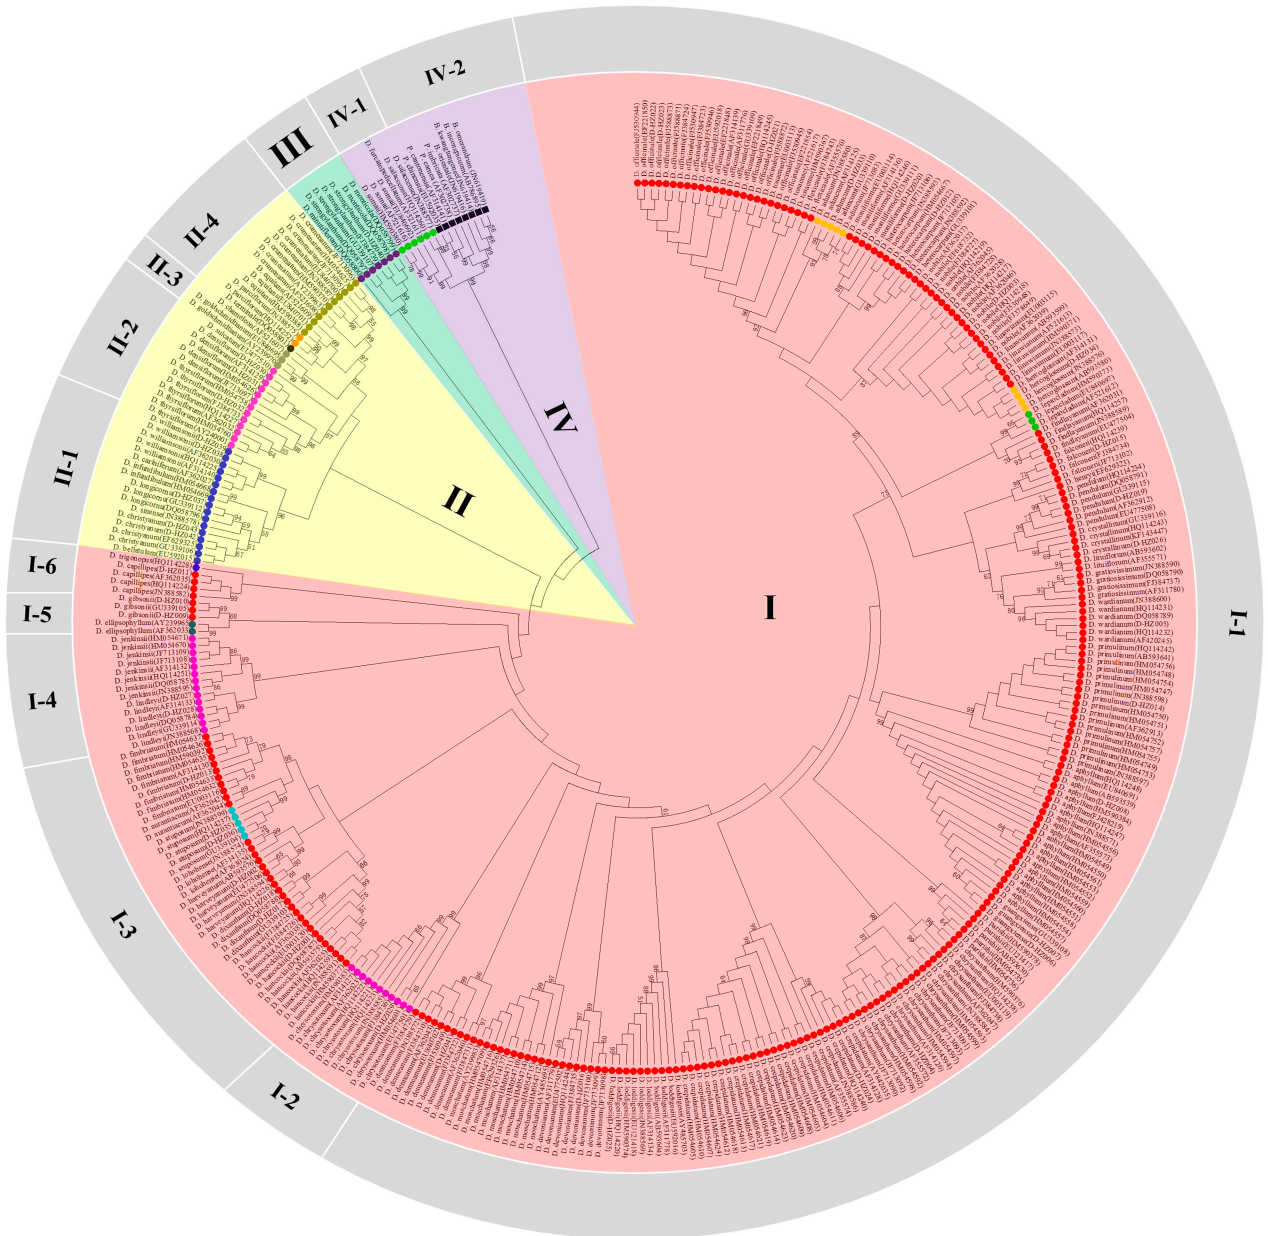

- Sect. *Dendrobium*    ● Sect. *Distichophyllum*    ● Sect. *Pedilonum*    ● Sect. *Crumenata*    ■ Outgroup
- Sect. *Grastidium*    ● Sect. *Breviflores*    ● Sect. *Formosae*    ● Sect. *Aporum*
- Sect. *Chrysotoxae*    ● Sect. *Stuposa*    ● Sect. *Stachyobium*    ● Sect. *Strongyle*

**Figure S1.** Neighbor-joining (NJ) tree based on ITS2 sequences for *Dendrobium* species. Numbers above branches indicate bootstrap support (BS  $\geq$  50) values
